# Supplementary material for: Effect of Sterols Isolated fromMyrtillocactus geometrizanson Growth Inhibition of Colon and Breast Cancer Cells
Source: Hindawi journal article supplement (doi:10.1155/2015/589350), 2015-01-01
Supplement: f1 [file 589350.f1.pdf]

1.78  
1.76  
1.74  
1.73

3.61  
3.60  
3.59  
3.58

2.40  
2.46  
2.46

0.97  
0.91  
0.86  
0.86

0.70

**<sup>1</sup>H NMR Macdougallin**  
500 MHz CDCl<sub>3</sub>

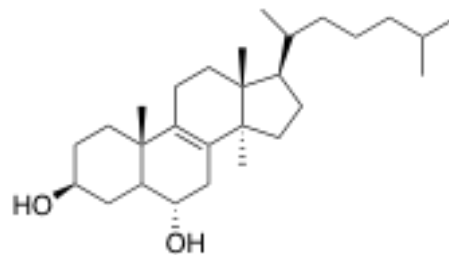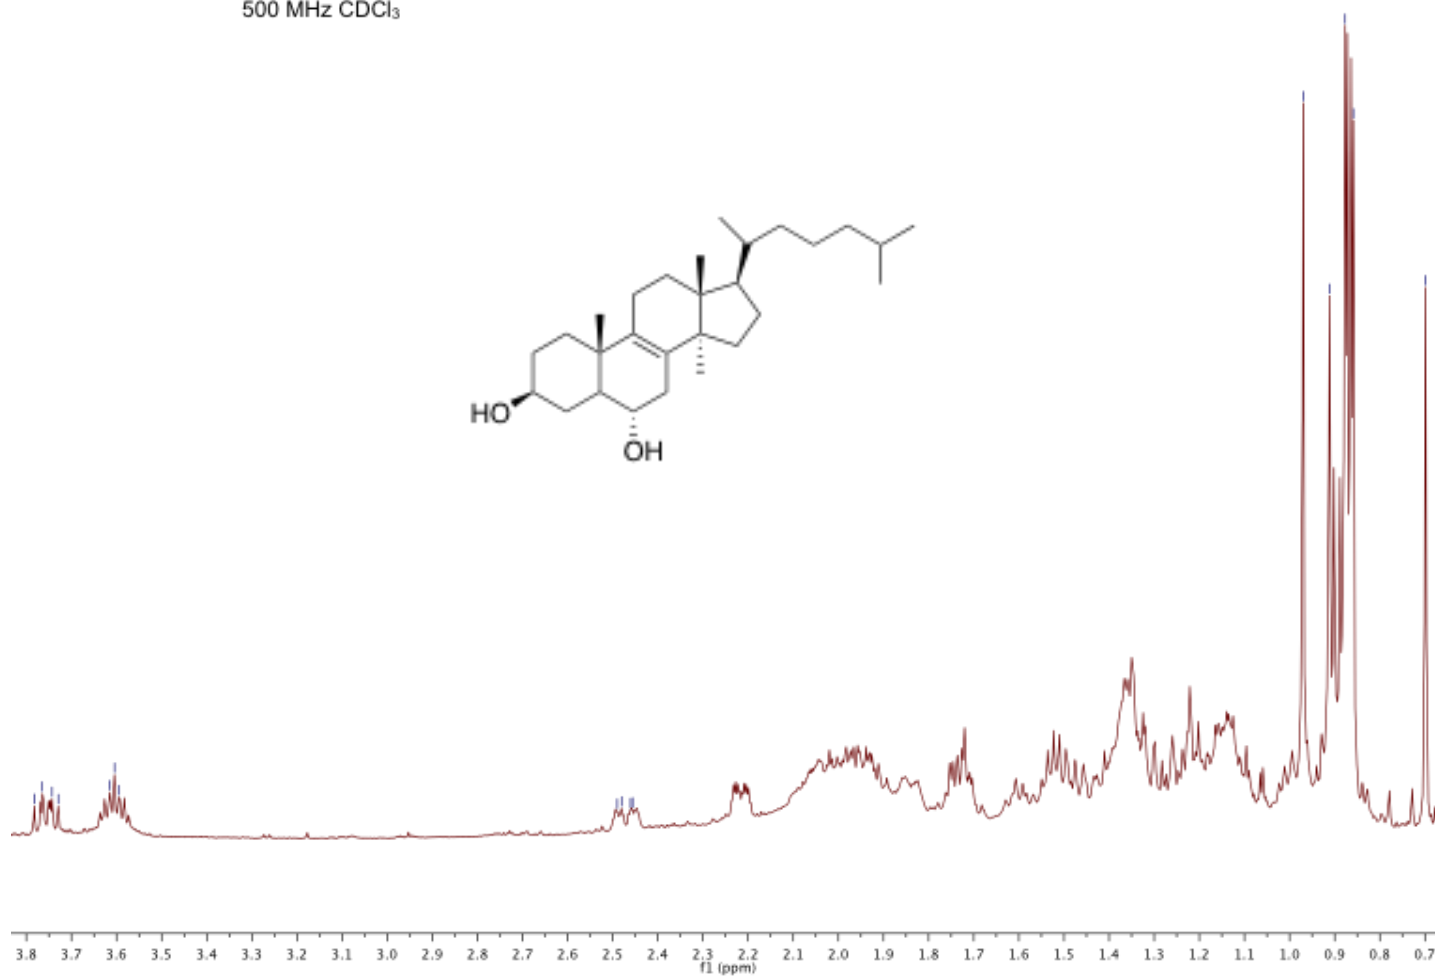

1H NMR Macdougallin  
500 MHz CDCl<sub>3</sub>

<sup>1</sup>H NMR (500 MHz, Chloroform-*d*) δ  
3.76 (ddd, *J* = 10.8, 8.9, 6.9 Hz, 1H),  
3.60 (tt, *J* = 10.4, 4.9 Hz, 1H).

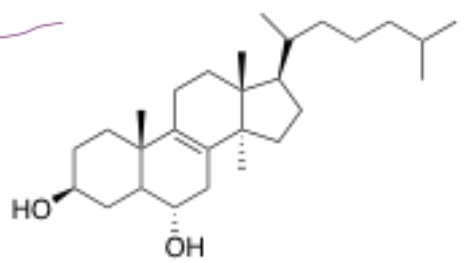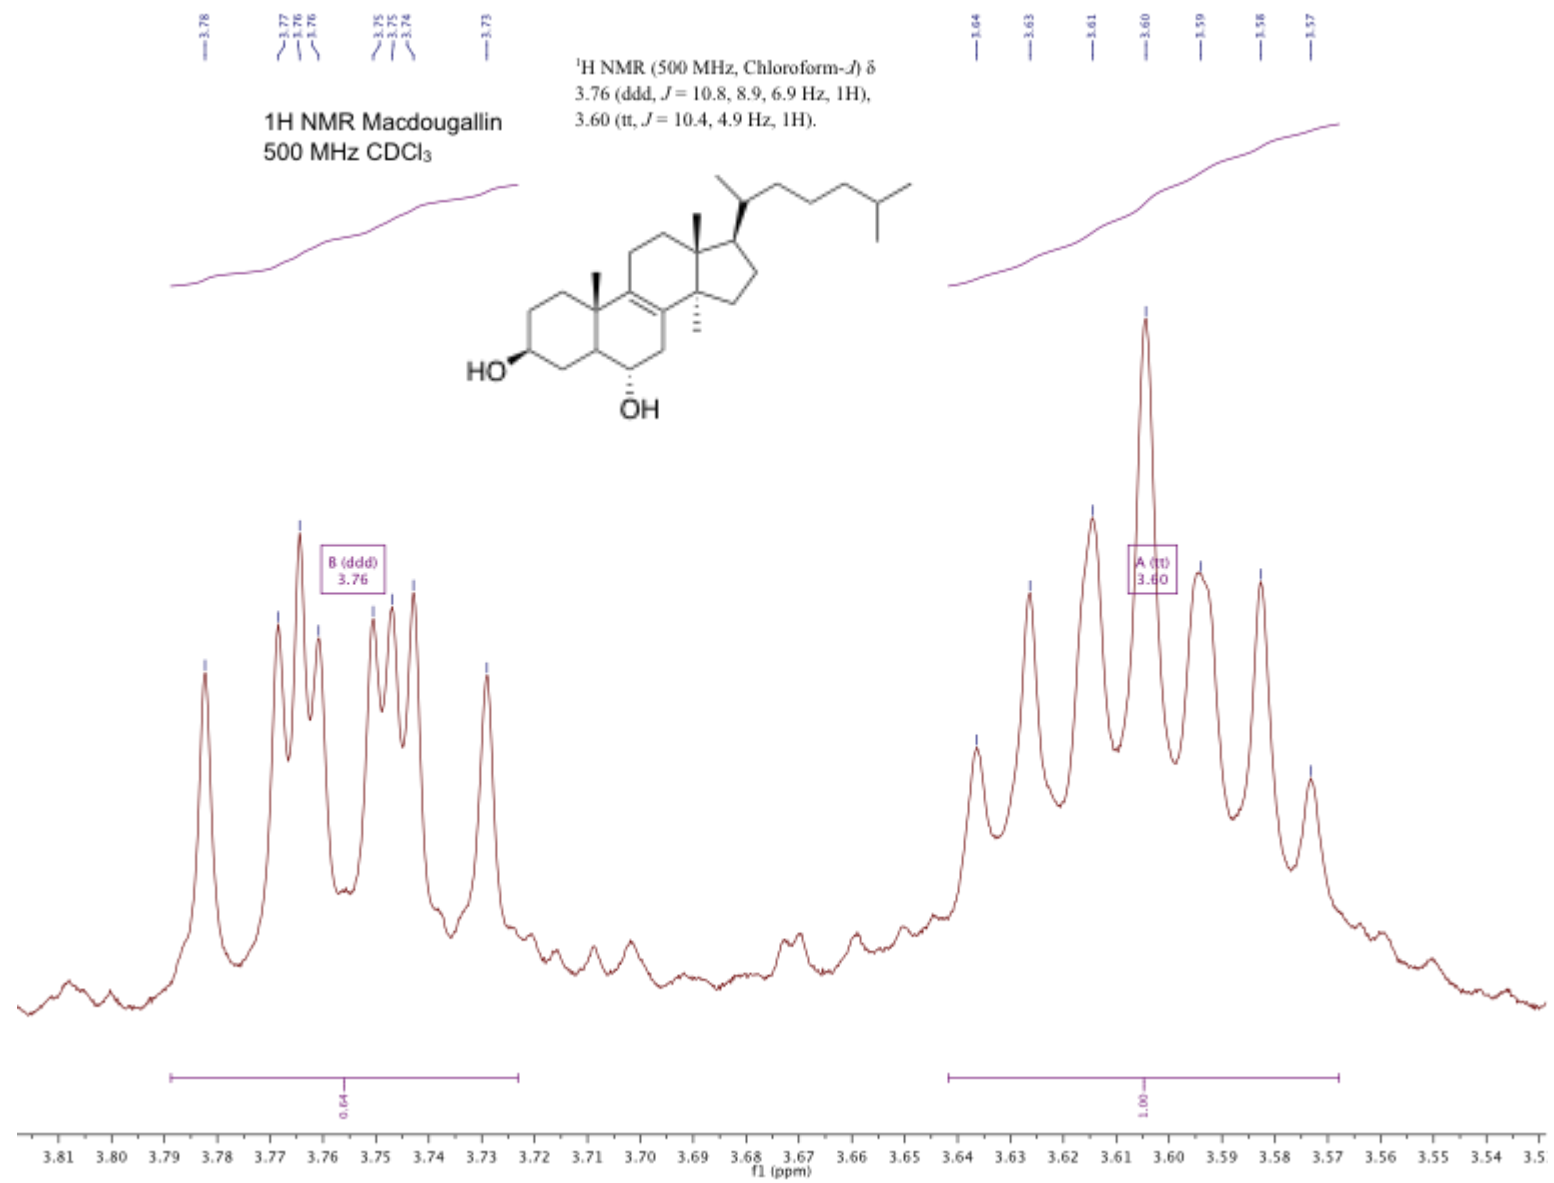

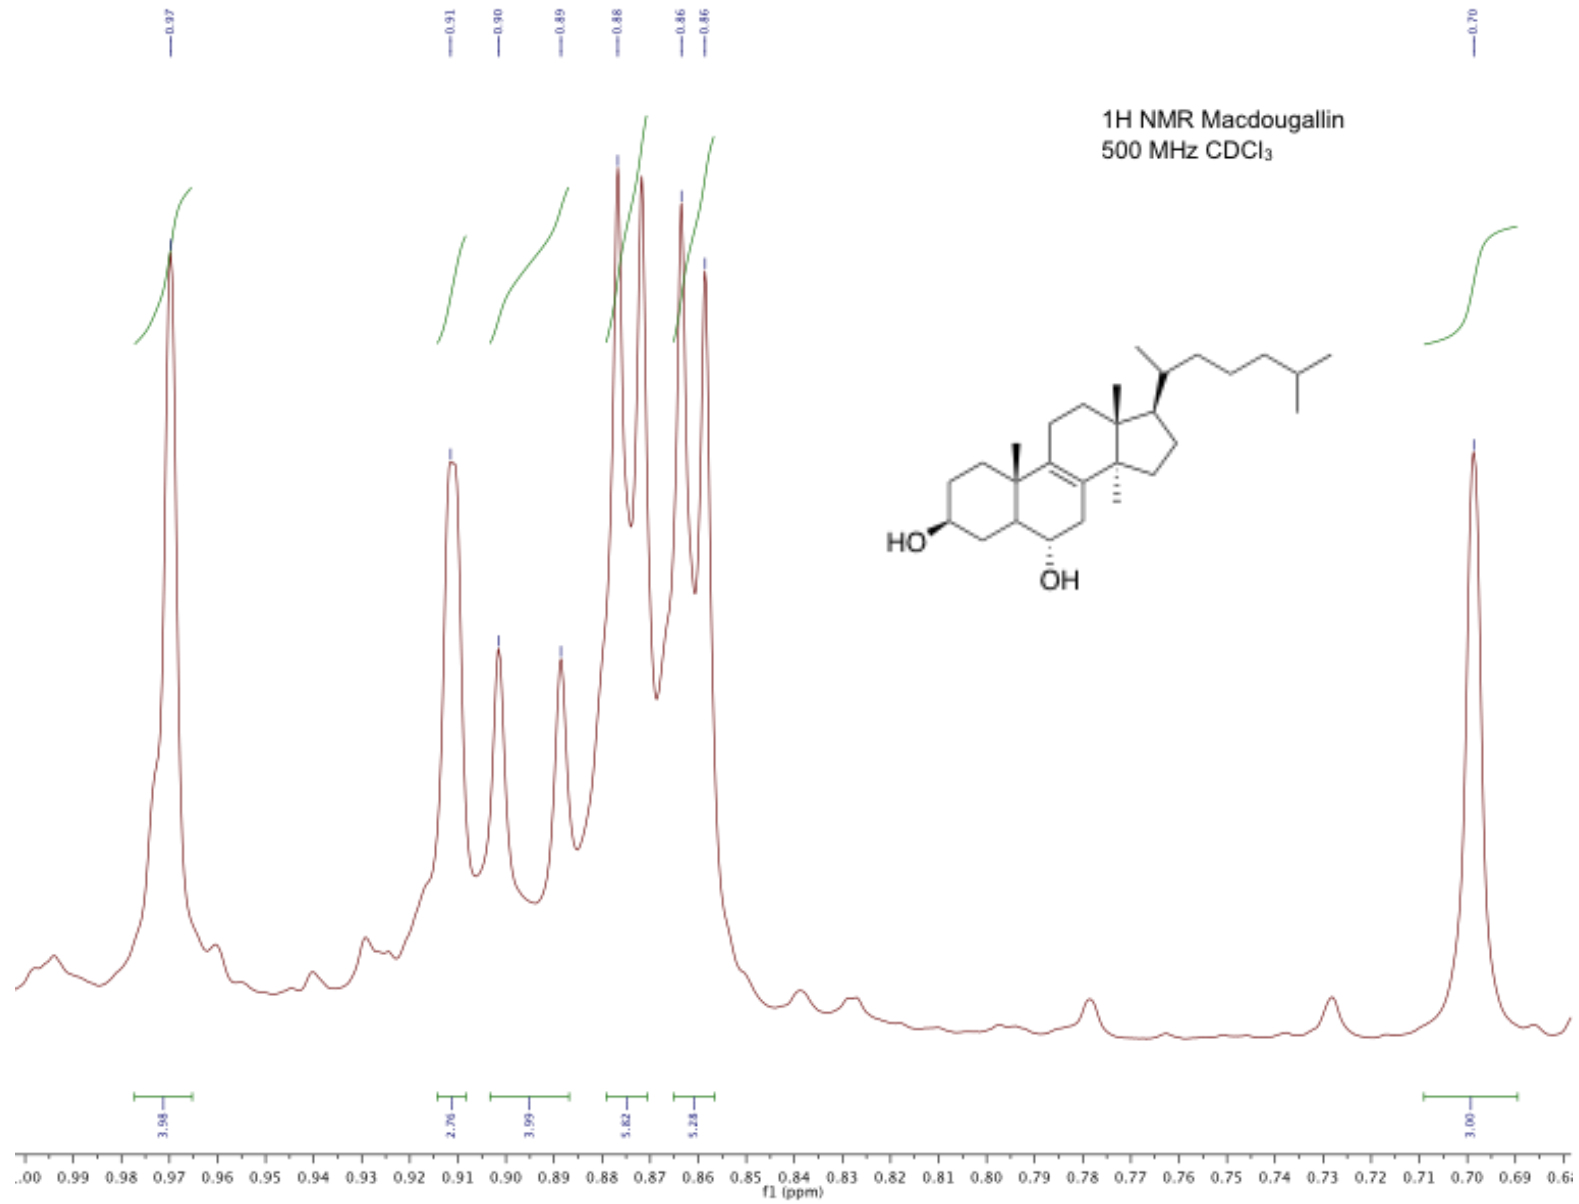

133.62  
133.06

Macdougallin <sup>13</sup>C NMR  
125 MHz CDCl<sub>3</sub>

71.11  
67.60

50.42  
49.51  
47.73

44.52

39.46  
37.70  
36.43

24.08

22.52

18.77

16.91  
15.70

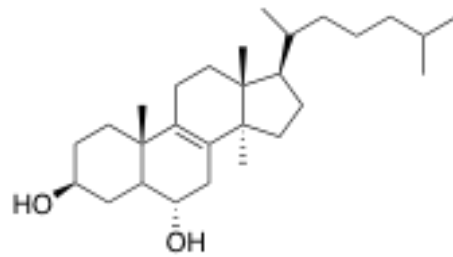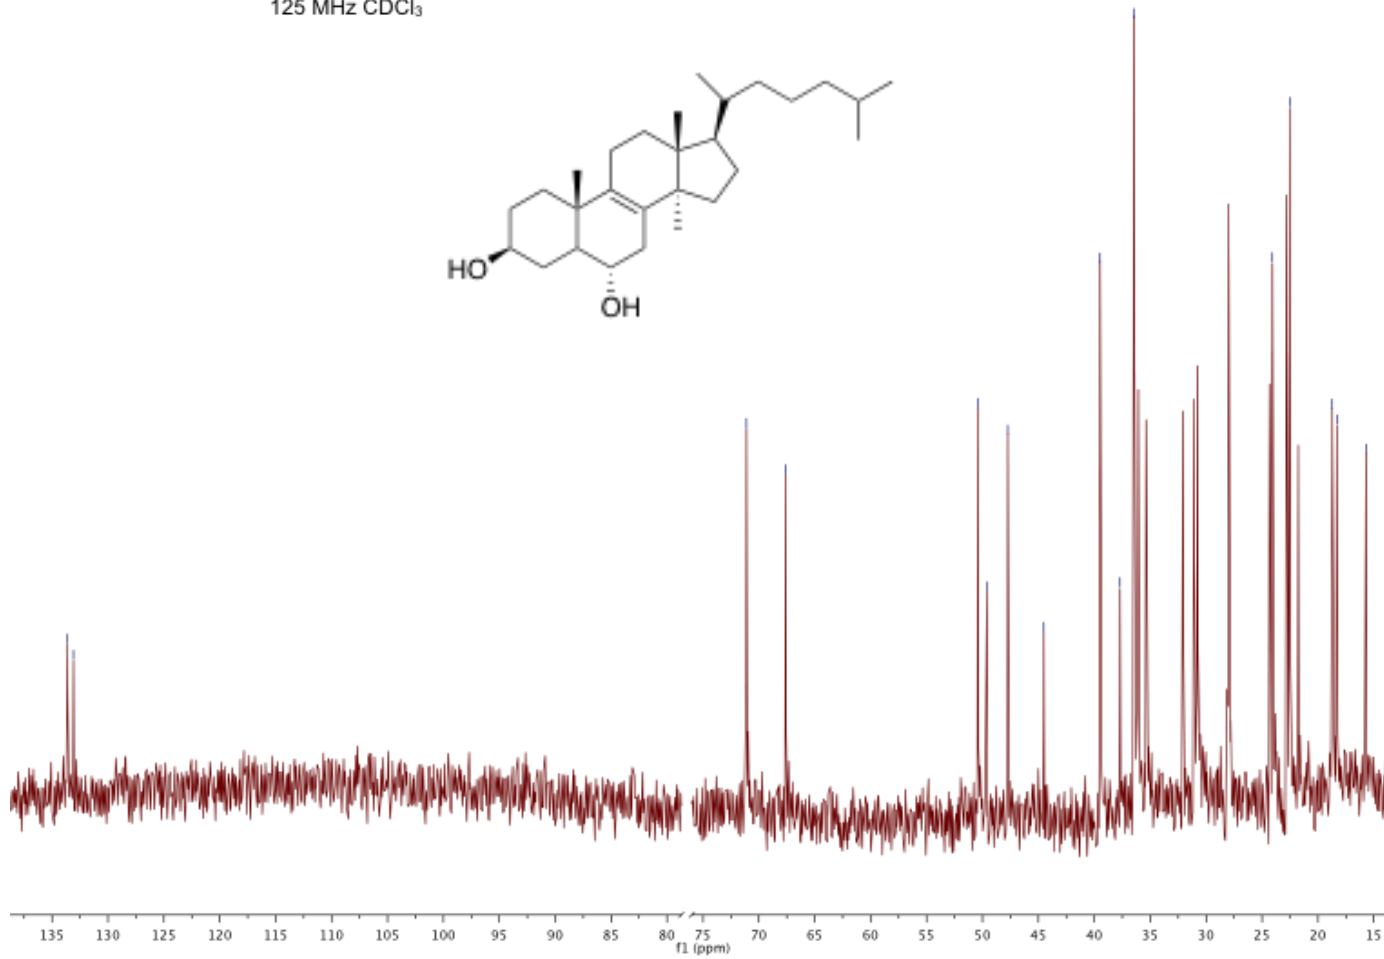

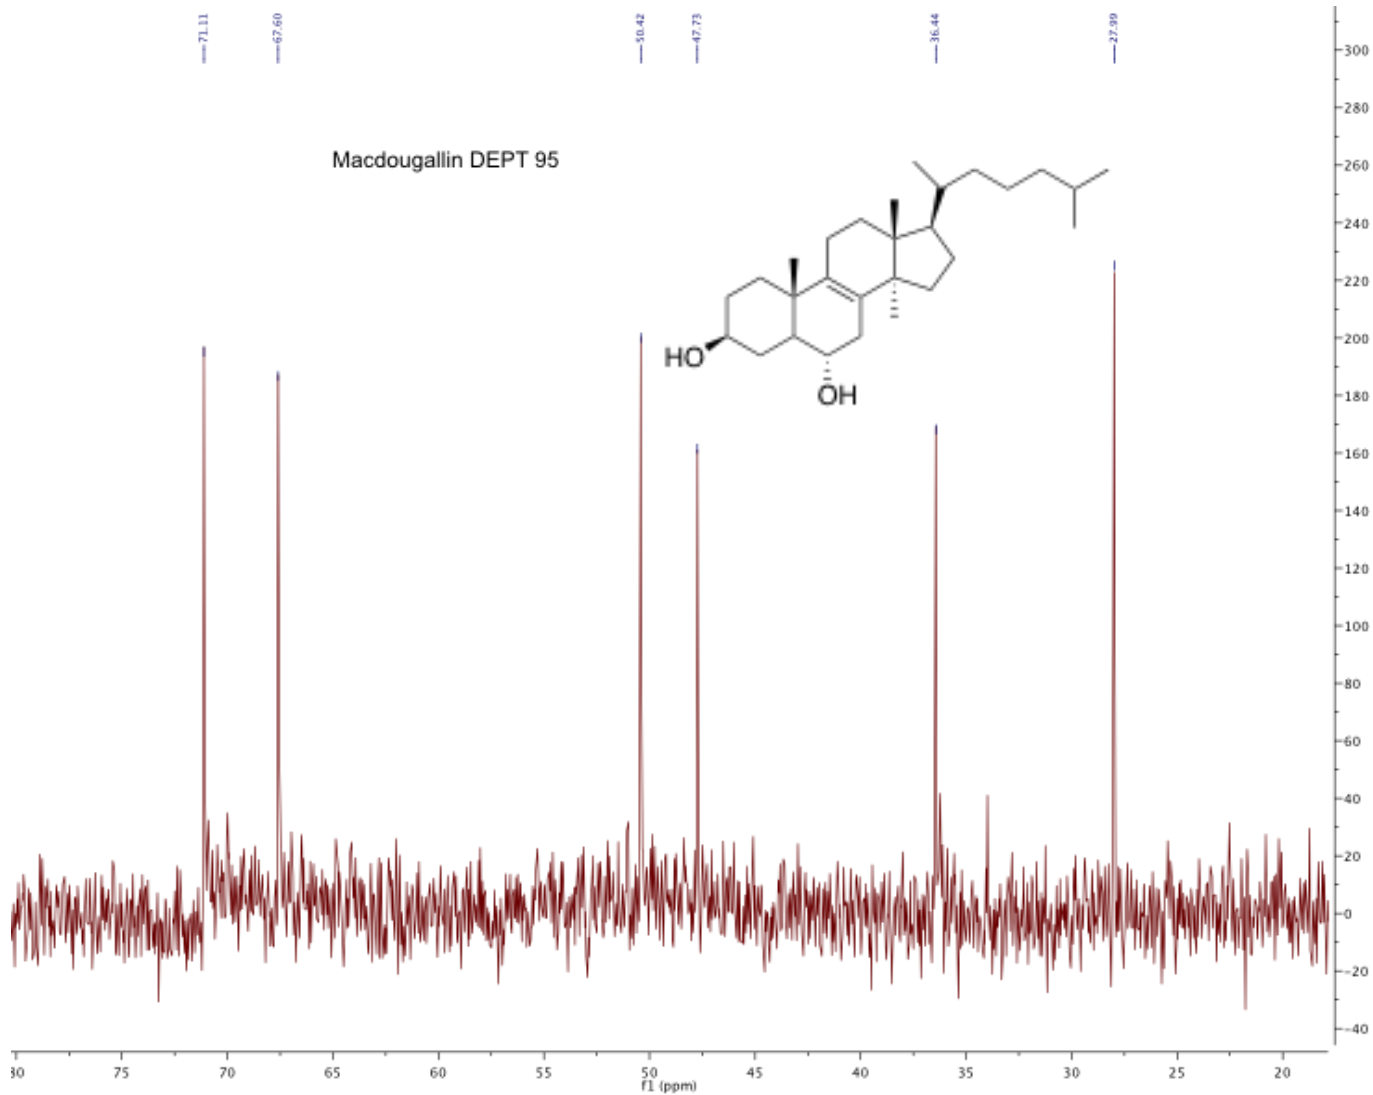

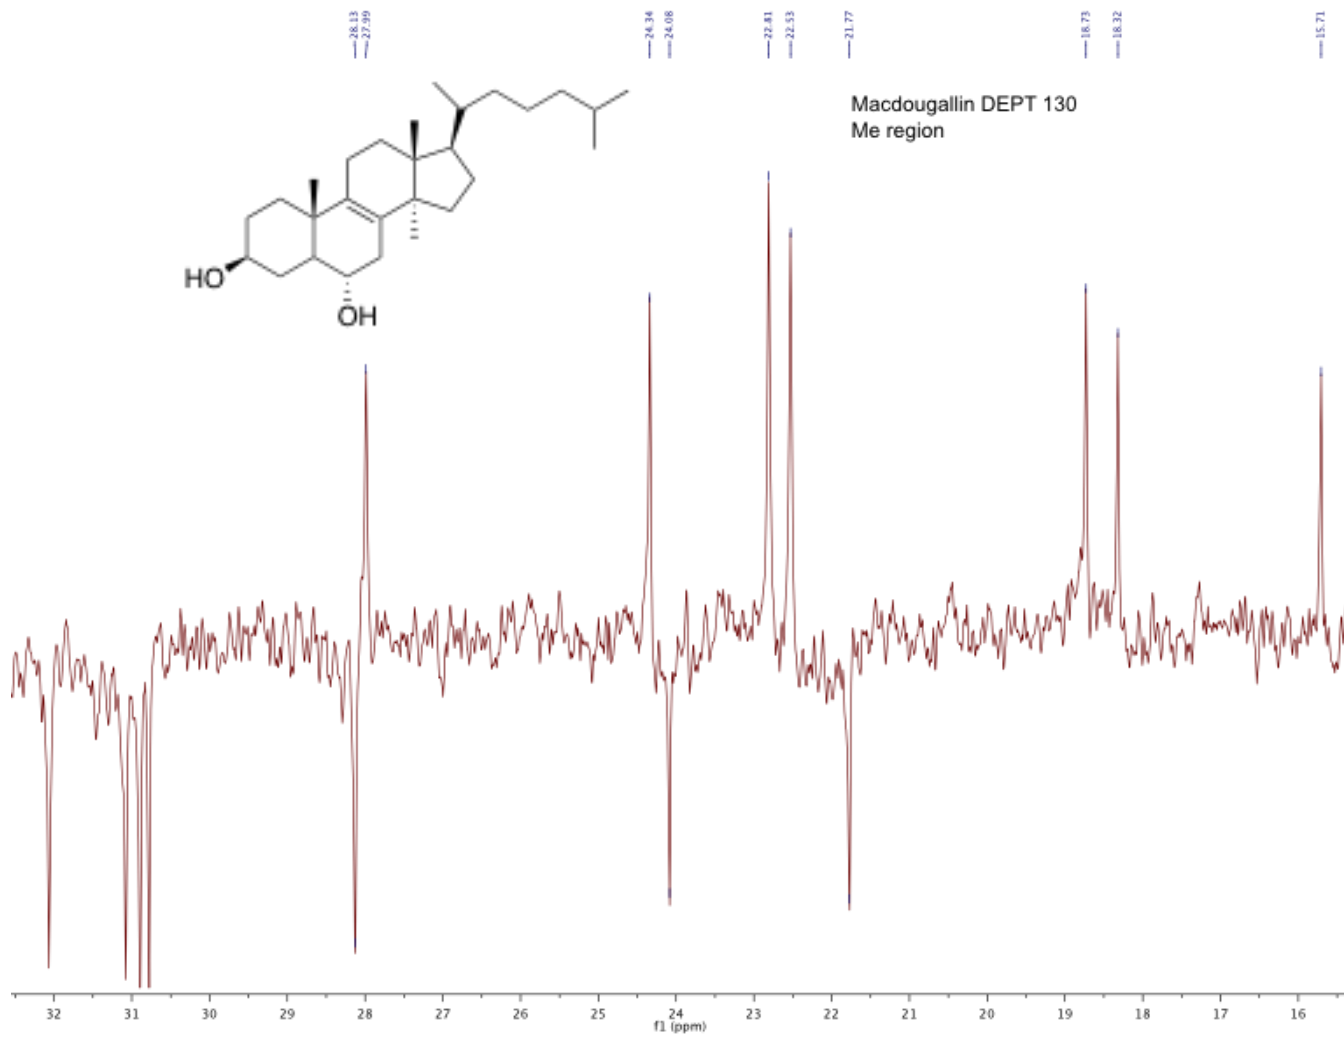

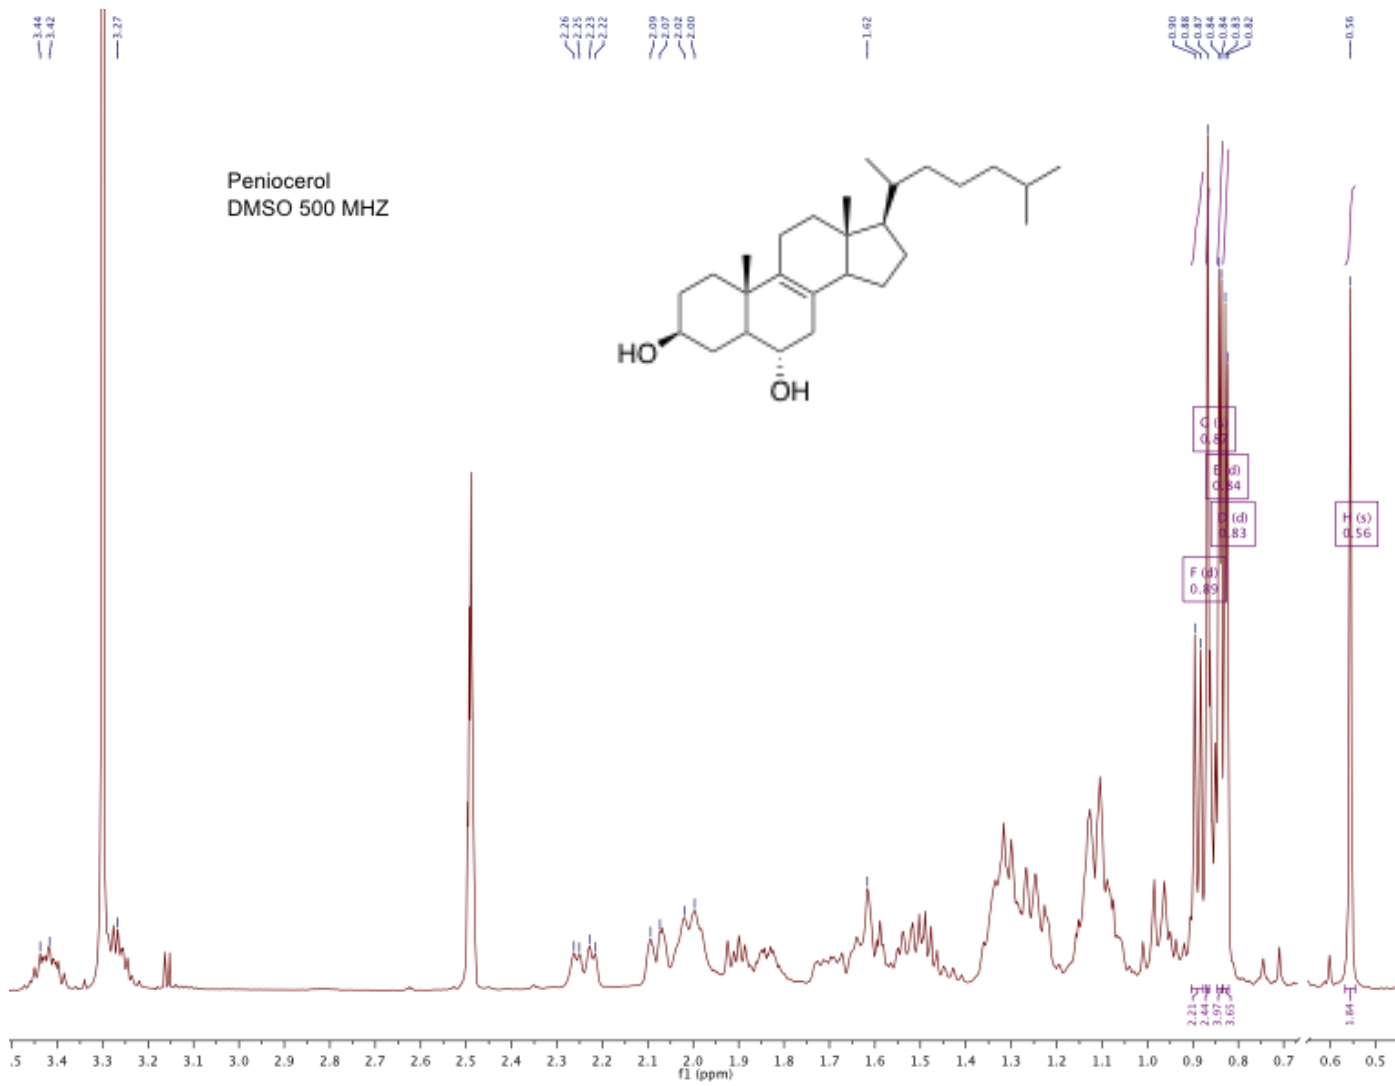

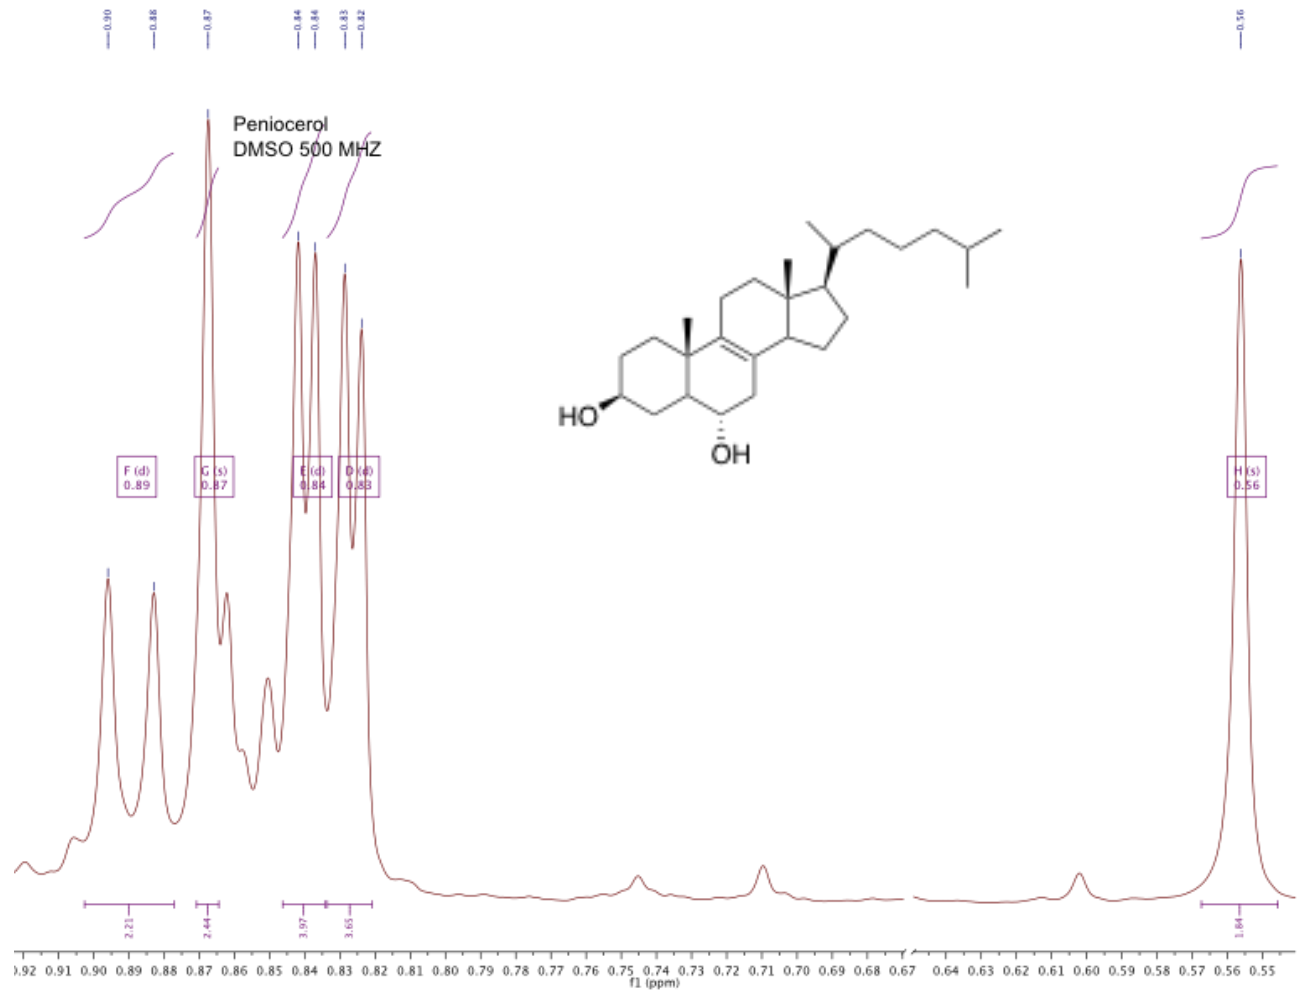



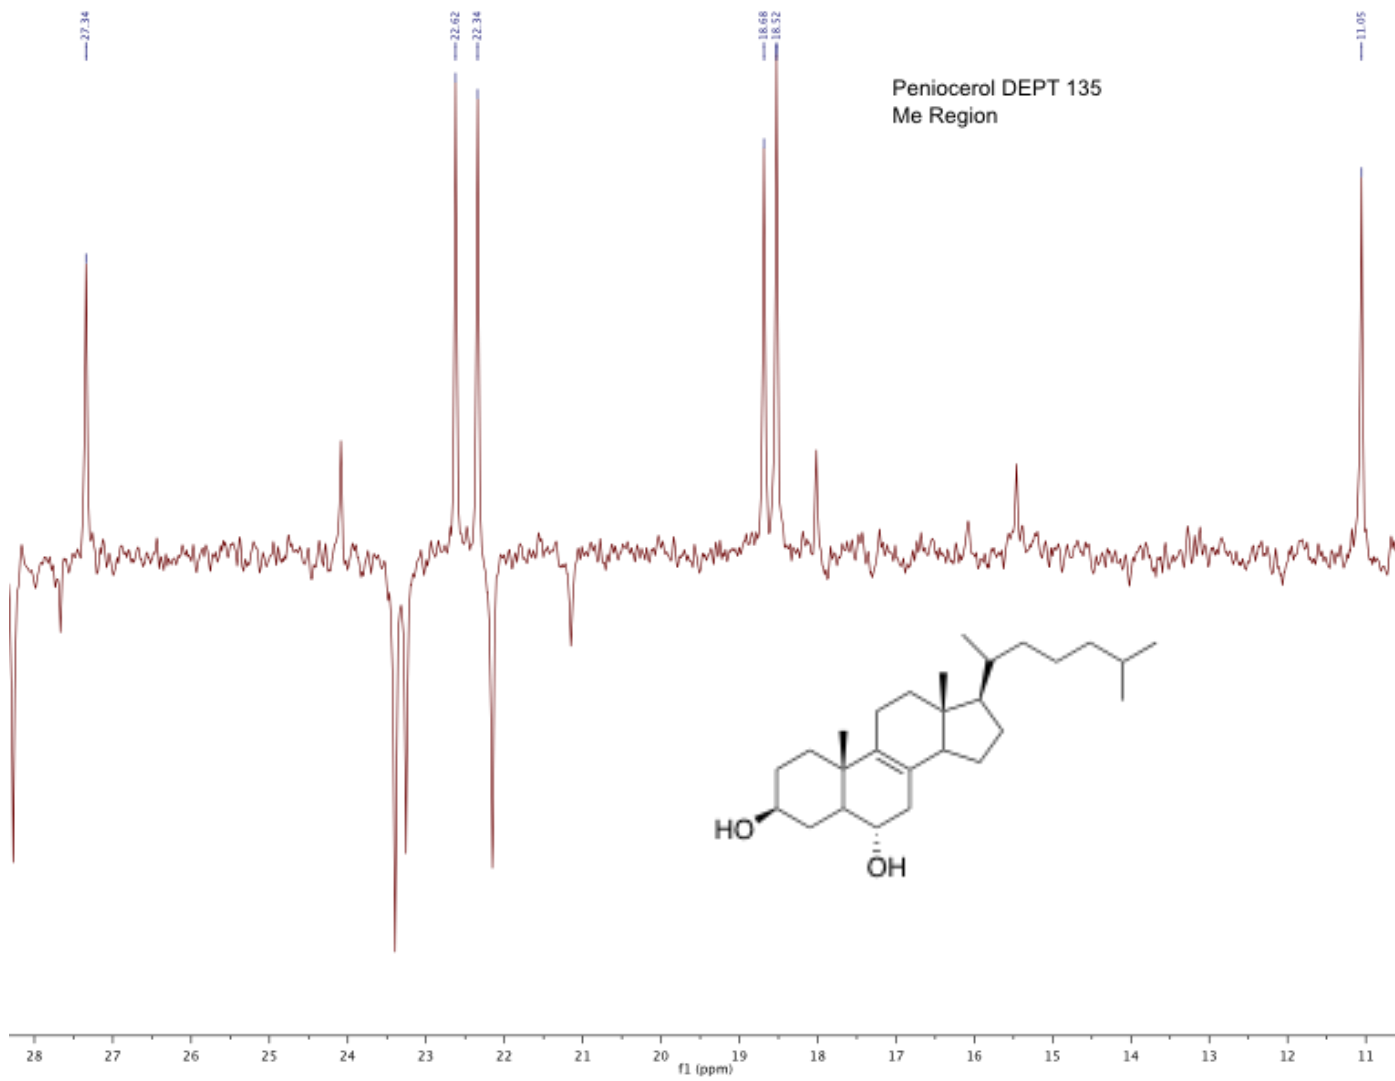

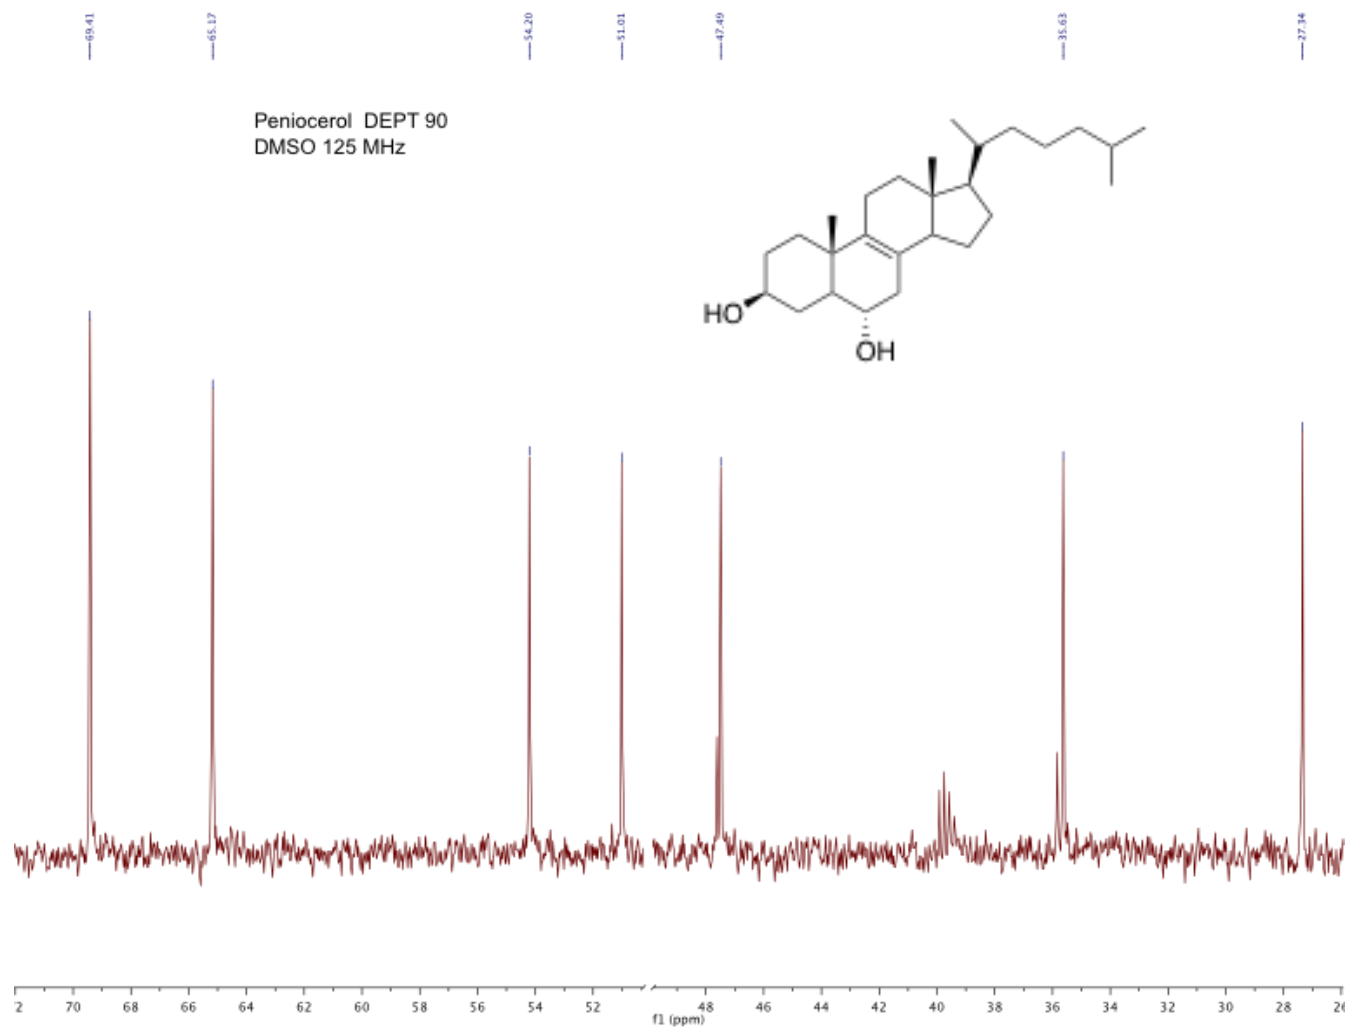

## Peniocerol's structure determinate by RX

Table 1. Crystal data and structure refinement for **Mgmr**.

|                                   |                                                            |                       |
|-----------------------------------|------------------------------------------------------------|-----------------------|
| Sample code                       | 252MVM08                                                   |                       |
| Project Title                     | <b>Mgmr</b>                                                |                       |
| Empirical formula                 | $C_{27}H_{46}O_2CH_3OH$                                    |                       |
| Formula weight                    | 434.68                                                     |                       |
| Temperature                       | 298(2) K                                                   |                       |
| Wavelength                        | 0.71073 Å                                                  |                       |
| Crystal system                    | Orthorhombic                                               |                       |
| Space group                       | $P 2_1 2_1 2_1$                                            |                       |
| Unit cell dimensions              | a = 8.147(3) Å                                             | $\alpha = 90^\circ$ . |
|                                   | b = 9.137(3) Å                                             | $\beta = 90^\circ$ .  |
|                                   | c = 36.585(14) Å                                           | $\gamma = 90^\circ$ . |
| Volume                            | 2723.3(18) Å <sup>3</sup>                                  |                       |
| Z                                 | 4                                                          |                       |
| Density (calculated)              | 1.060 Mg/m <sup>3</sup>                                    |                       |
| Absorption coefficient            | 0.066 mm <sup>-1</sup>                                     |                       |
| F(000)                            | 968                                                        |                       |
| Crystal size / shape / color      | 0.30 x 0.07 x 0.05 mm / Prism/ Colorless                   |                       |
| Theta range for data collection   | 2.23 to 25.68°.                                            |                       |
| Diffractometer used /Scan Mode    | Bruker Smart APEX AXS CCD area detector/ omega scans       |                       |
| Index ranges                      | $-9 \leq h \leq 9, -11 \leq k \leq 10, -44 \leq l \leq 44$ |                       |
| Reflections collected             | 29873                                                      |                       |
| Independent reflections           | 5129 [R(int) = 0.1862]                                     |                       |
| Completeness to theta = 25.68°    | 99.7 %                                                     |                       |
| Absorption correction             | None                                                       |                       |
| Refinement method                 | Full-matrix least-squares on F <sup>2</sup>                |                       |
| Data / restraints / parameters    | 5129 / 3 / 295                                             |                       |
| Goodness-of-fit on F <sup>2</sup> | 1.000                                                      |                       |
| Final R indices [I > 2sigma(I)]   | R1 = 0.1031, wR2 = 0.1219                                  |                       |
| R indices (all data)              | R1 = 0.2490, wR2 = 0.1637                                  |                       |
| Absolute structure parameter      | Not determined.                                            |                       |
| Largest diff. peak and hole       | 0.158 and -0.129 e.Å <sup>-3</sup>                         |                       |
| Solved by                         | Simon Hernandez-Ortega                                     |                       |

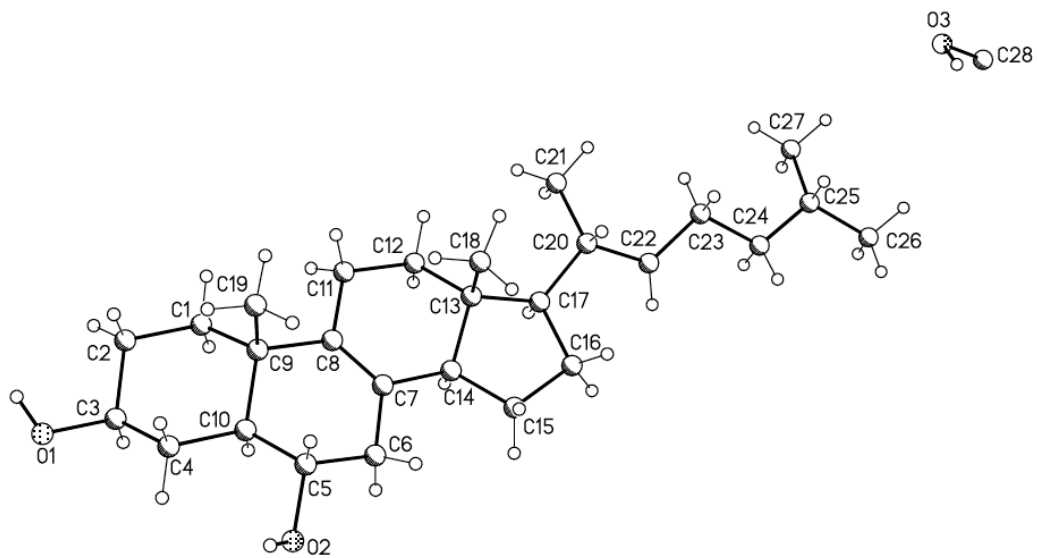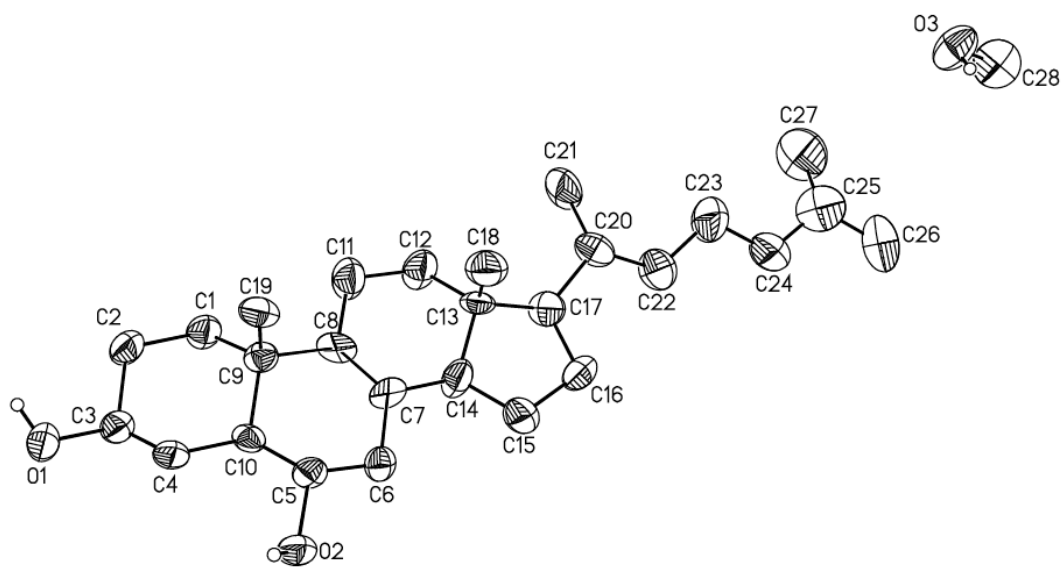

=====  
Acq. Operator : Erendira Garcia  
Acq. Instrument : CL6-LCR-IQUI Location : Vial 1  
Injection Date : 3/20/2015 4:56:44 PM  
Acq. Method : C:\HPCHEM\1\METHODS\MARIANO.M  
Last changed : 3/20/2015 3:25:27 PM by Erendira Garcia  
(modified after loading)  
Analysis Method : C:\CHEM32\1\METHODS\123.M  
Last changed : 3/20/2015 4:15:38 PM by CARMEN  
(modified after loading)  
Sample Info : Eclipse Plus C18 3.5um 100x2.1mm flujo 0.2 mL/min 254 nm  
Agua/ACN Inicial 80/20 20 min 0/100

DAD1 C, Sig=254,16 Ref=360,100 (MVM00009.D)

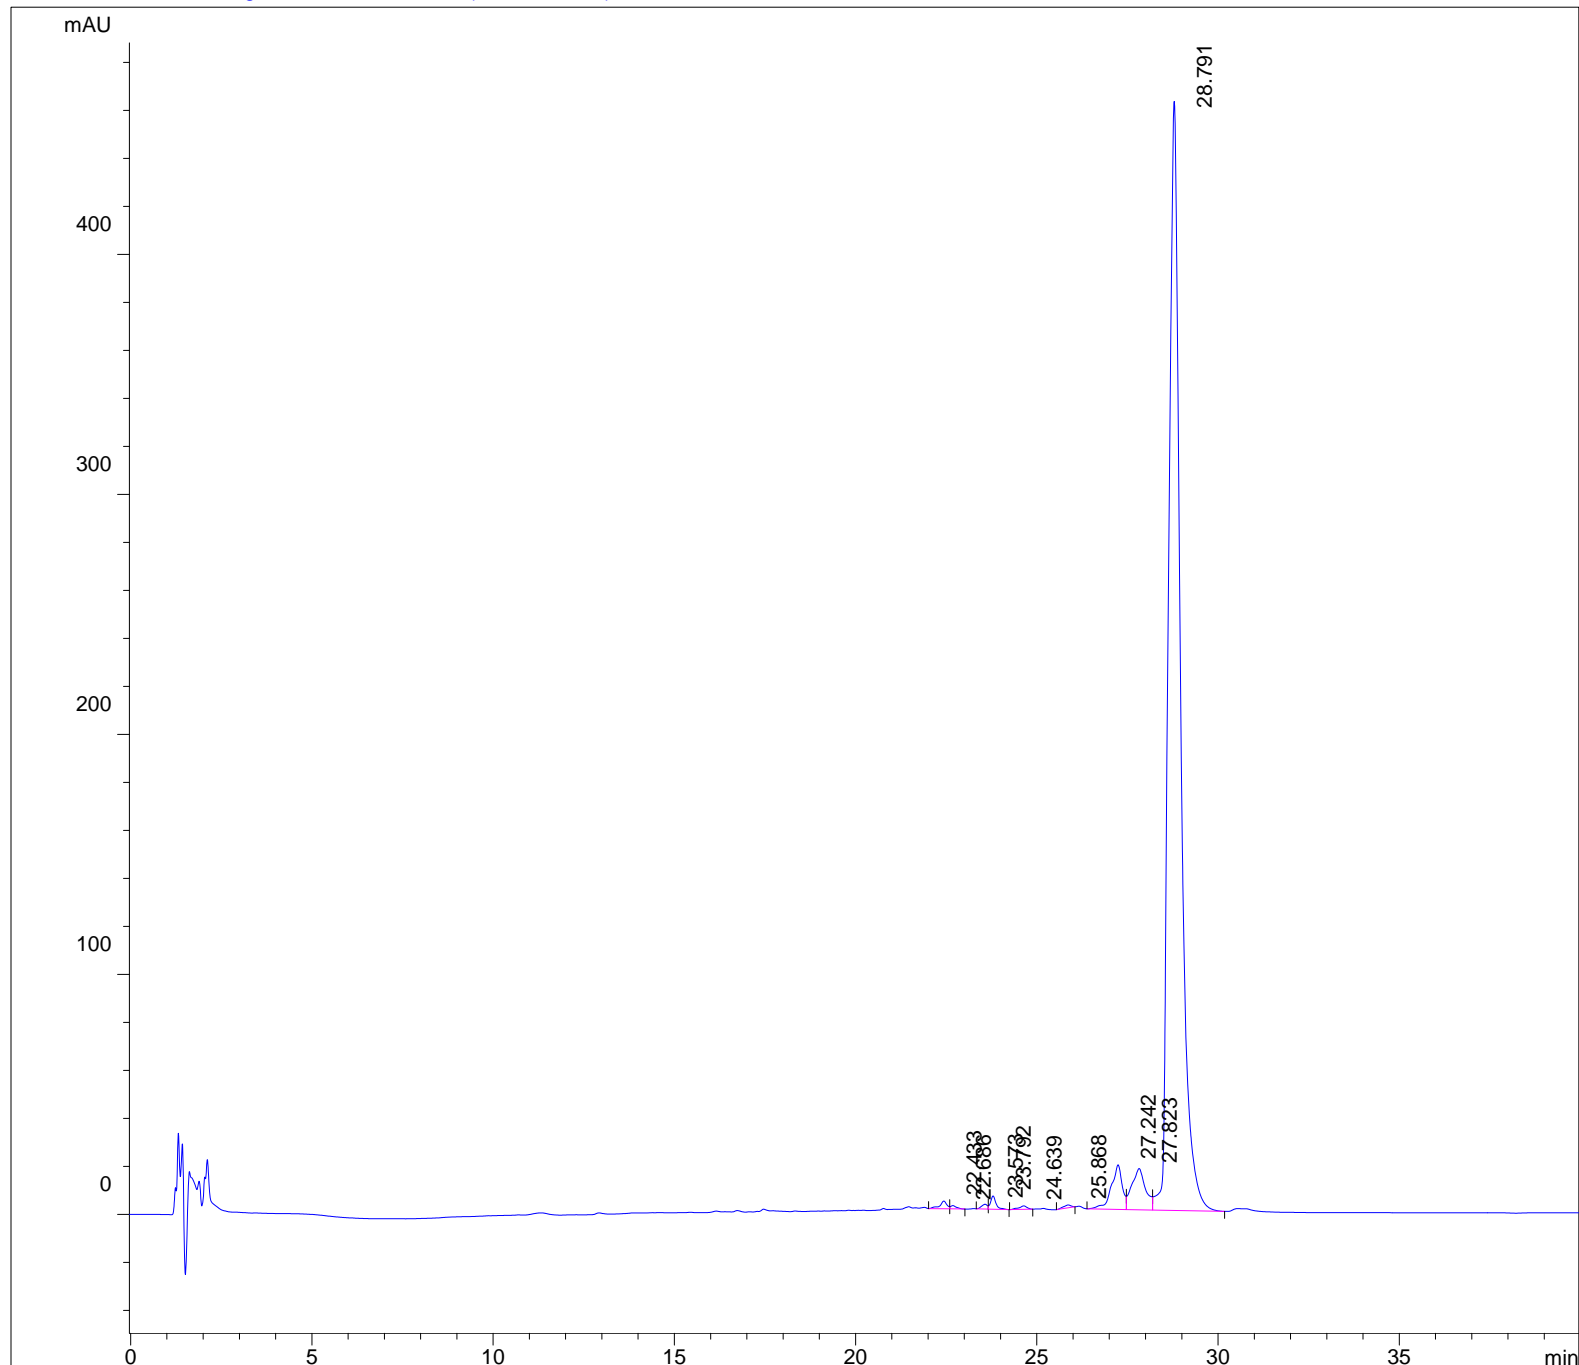

=====  
Area Percent Report  
=====

Sorted By : Signal  
Multiplier: : 1.0000  
Dilution: : 1.0000  
Use Multiplier & Dilution Factor with ISTDs

Signal 1: DAD1 C, Sig=254,16 Ref=360,100

| Peak # | RetTime [min] | Type | Width [min] | Area [mAU*s] | Height [mAU] | Area %  |
|--------|---------------|------|-------------|--------------|--------------|---------|
| 1      | 22.433        | BV   | 0.1919      | 43.96069     | 3.24812      | 0.3798  |
| 2      | 22.686        | VB   | 0.1573      | 15.55498     | 1.38220      | 0.1344  |
| 3      | 23.573        | BV   | 0.1635      | 21.66733     | 1.98282      | 0.1872  |
| 4      | 23.792        | VB   | 0.1538      | 57.87674     | 5.54340      | 0.5001  |
| 5      | 24.639        | BB   | 0.2283      | 22.81826     | 1.44417      | 0.1972  |
| 6      | 25.868        | BB   | 0.2154      | 18.23200     | 1.19906      | 0.1575  |
| 7      | 27.242        | BV   | 0.2839      | 388.60580    | 18.58577     | 3.3577  |
| 8      | 27.823        | VV   | 0.3577      | 453.43222    | 17.19118     | 3.9178  |
| 9      | 28.791        | VB   | 0.3224      | 1.05515e4    | 462.12866    | 91.1683 |

Totals : 1.15736e4 512.70538

=====  
\*\*\* End of Report \*\*\*

=====  
Acq. Operator : Erendira Garcia  
Acq. Instrument : CL6-LCR-IQUI Location : Vial 1  
Injection Date : 3/20/2015 3:41:44 PM  
Acq. Method : C:\HPCHEM\1\METHODS\MARIANO.M  
Last changed : 3/20/2015 3:25:27 PM by Erendira Garcia  
(modified after loading)  
Analysis Method : C:\CHEM32\1\METHODS\123.M  
Last changed : 3/20/2015 3:26:08 PM by CARMEN  
Sample Info : Eclipse Plus C18 3.5um 100x2.1mm flujo 0.2 mL/min 254 nm  
Agua/ACN Inicial 80/20 20 min 0/100

DAD1 C, Sig=254,16 Ref=360,100 (MVM00008.D)

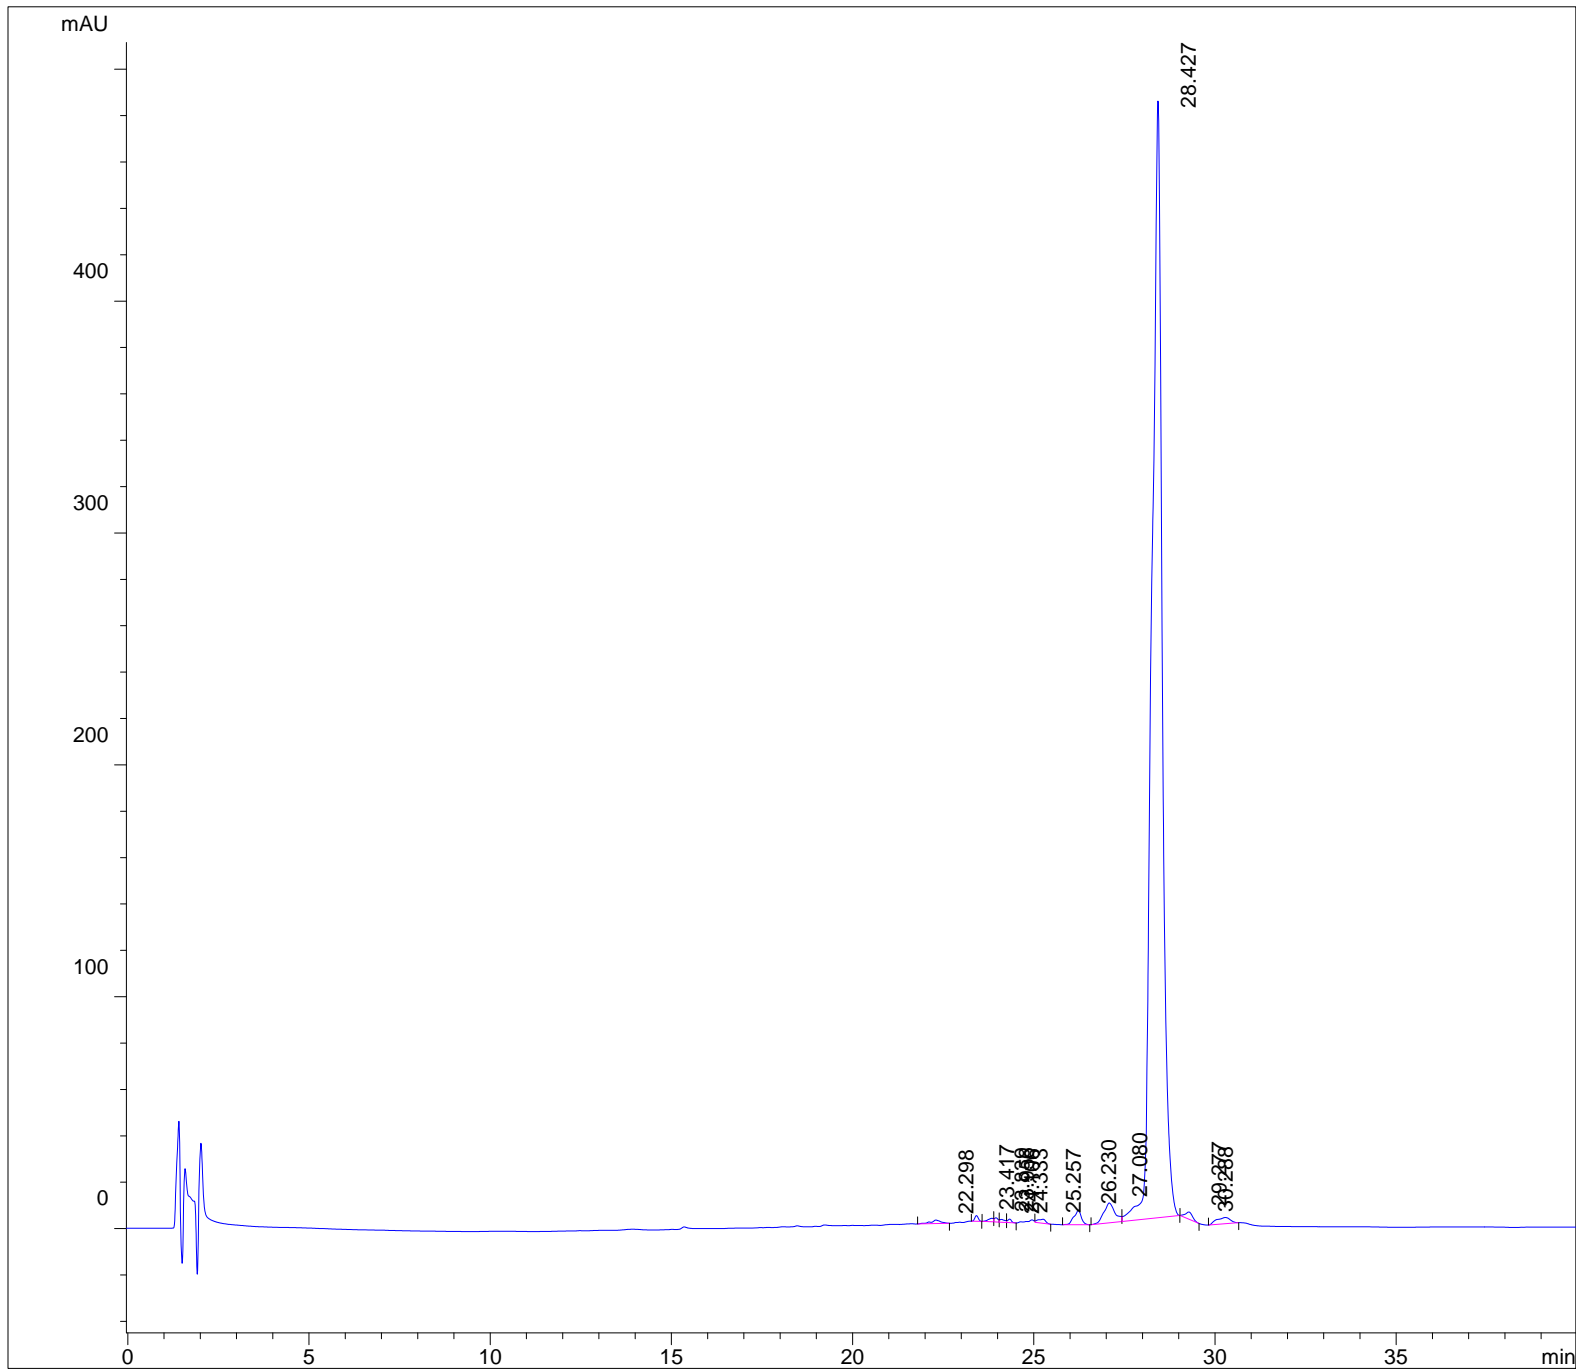

=====  
Area Percent Report  
=====

Sorted By : Signal  
Multiplier: : 1.0000  
Dilution: : 1.0000  
Use Multiplier & Dilution Factor with ISTDs

Signal 1: DAD1 C, Sig=254,16 Ref=360,100

| Peak # | RetTime [min] | Type | Width [min] | Area [mAU*s] | Height [mAU] | Area %  |
|--------|---------------|------|-------------|--------------|--------------|---------|
| 1      | 22.298        | BB   | 0.2518      | 28.87656     | 1.50566      | 0.2849  |
| 2      | 23.417        | BB   | 0.1036      | 16.44096     | 2.47249      | 0.1622  |
| 3      | 23.839        | BV   | 0.1359      | 15.26783     | 1.53679      | 0.1506  |
| 4      | 23.956        | VV   | 0.1055      | 13.32459     | 1.81870      | 0.1314  |
| 5      | 24.106        | VV   | 0.1361      | 12.20759     | 1.22673      | 0.1204  |
| 6      | 24.333        | VB   | 0.1044      | 10.71939     | 1.51783      | 0.1057  |
| 7      | 25.257        | VB   | 0.1987      | 26.18956     | 1.78988      | 0.2584  |
| 8      | 26.230        | BB   | 0.1944      | 88.25874     | 6.26259      | 0.8707  |
| 9      | 27.080        | BV   | 0.3049      | 182.31735    | 8.54637      | 1.7985  |
| 10     | 28.427        | VB   | 0.2772      | 9627.62500   | 481.68204    | 94.9748 |
| 11     | 29.277        | BB   | 0.2056      | 42.91954     | 3.09767      | 0.4234  |
| 12     | 30.288        | BB   | 0.3763      | 72.88666     | 2.70575      | 0.7190  |

Totals : 1.01370e4 514.16252

=====  
\*\*\* End of Report \*\*\*
